# Supplementary material
Source: PubMed Central journal article supplement (PMC5340421)
Supplement: NIHMS846703-supplement-Supporting_information.pdf [file NIHMS846703-supplement-Supporting_information.pdf]

## Supplementary Information

### Ultra-High Resolution Ion Mobility Separations Utilizing Traveling Waves in a 13-m Serpentine Path Length Structures for Lossless Ion Manipulations Module

Liulin Deng, Yehia M. Ibrahim, Ahmed M. Hamid, Sandilya V. B. Garimella, Ian K. Webb, Xueyun Zheng, Spencer A. Prost, Jeremy A. Sandoval, Randolph V. Norheim, Gordon A. Anderson, Aleksey V. Tolmachev, Erin S. Baker and Richard D. Smith<sup>†</sup>

*Biological Sciences Division and Environmental Molecular Sciences Laboratory,  
Pacific Northwest National Laboratory, Richland, WA*

<sup>†</sup>Corresponding author: Richard D. Smith

Address: 902 Battelle Blvd.  
P.O. Box 999, MSIN K8-98  
Richland, WA 99352  
Phone: 509-371-6219  
Fax: 509-371-6564  
Email: rds@pnnl.gov

**Figure S-1.** Ion mobility spectrum of Agilent tuning mix using DT-IMS under 19 V/cm (90cm).

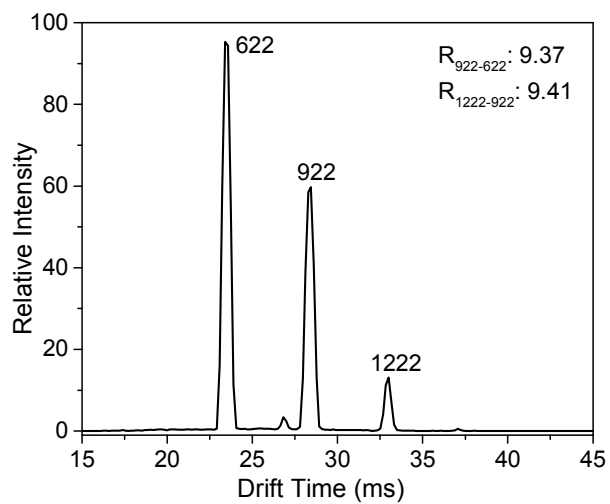

**Figure S-2.** (A) Resolution, (B) Separation and (C) Averaged peak width (FWHM) for the  $m/z$  622 and 922 peaks were measured as a function of traveling wave speed at different gaps between two surfaces at 4.00 Torr  $N_2$  using the settings: traveling wave with amplitude of 30V, guard bias of 5V, and RF amplitude of 220  $V_{pp}$  at 650 kHz.

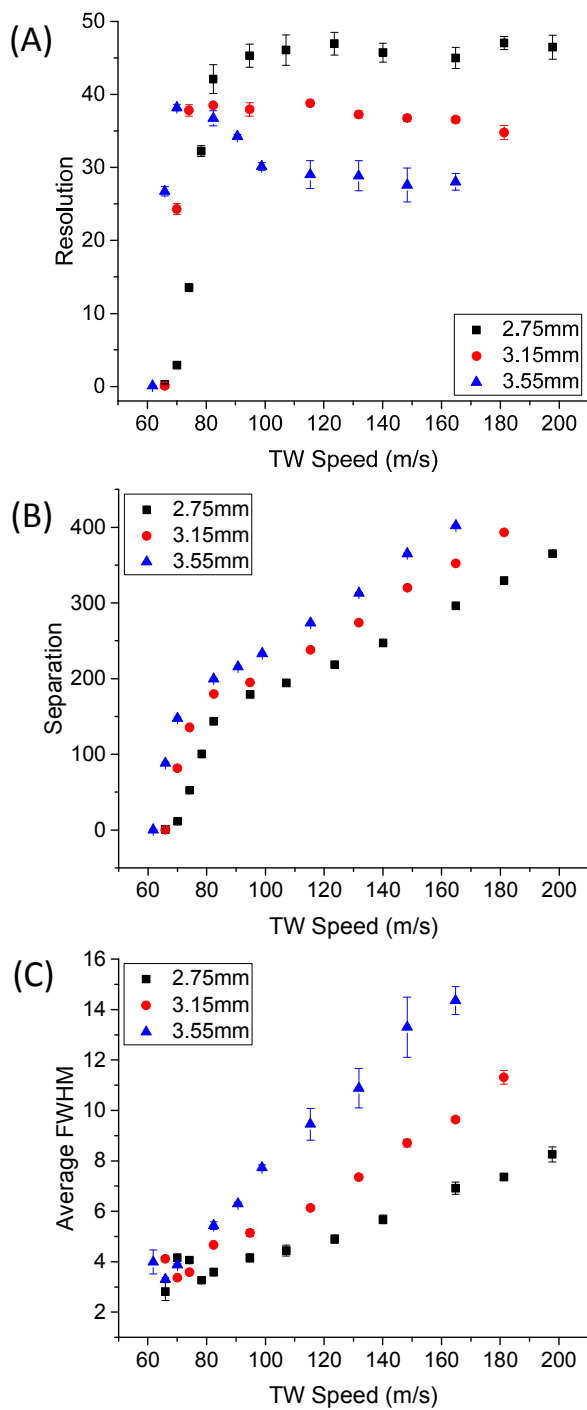

**Figure S-3.** Drift time of (A)  $m/z$  622; (B)  $m/z$  922; (C) Separation and (D) Average peak width (FWHM) for the  $m/z$  622 and 922 peaks was measured as a function of traveling wave speed at various pressures from 2.00 Torr to 4.00 Torr  $N_2$  with the following conditions: traveling wave with amplitude of 30V, guard bias of 5V, and RF amplitude of 220  $V_{pp}$  at 650 kHz with 2.75 mm gap.

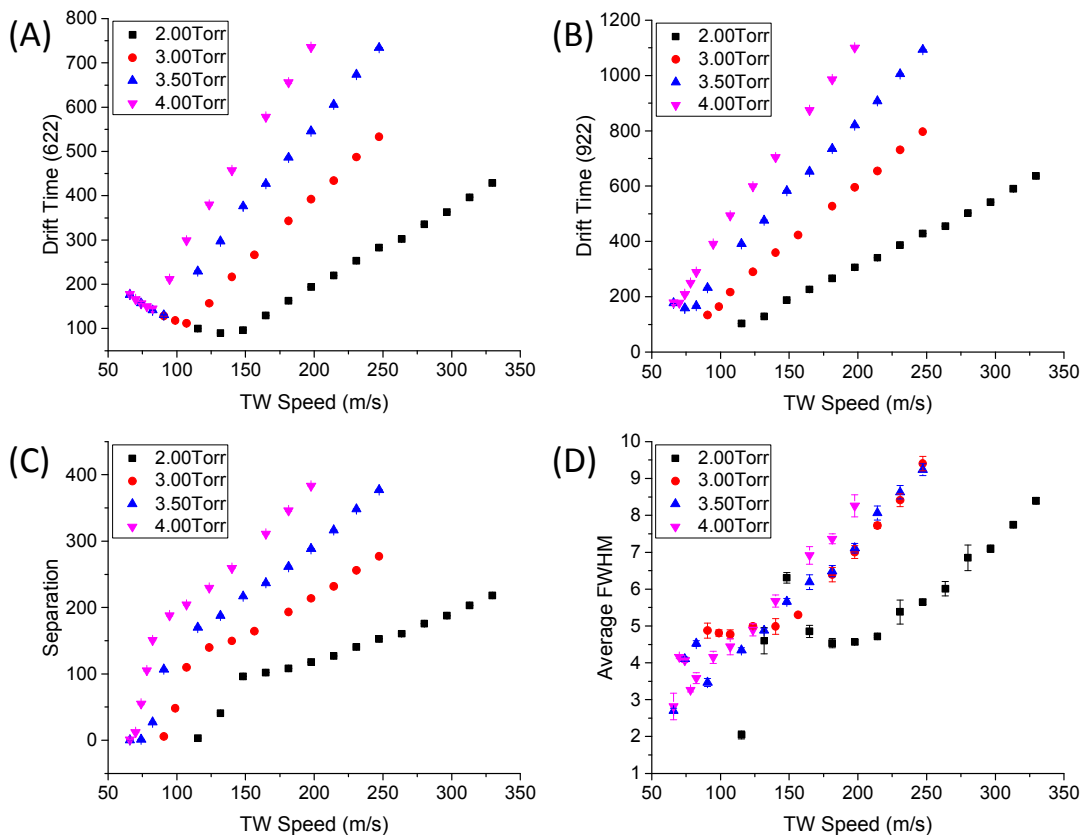

**Figure S-4.** Resolution for the  $m/z$  622 and 922 peaks was measured at 123.6 m/s as a function of (A) Traveling wave amplitude under conditions of guard bias of 5V, RF amplitude of  $220V_{pp}$  at 650 kHz, and 2.75 mm gap at 4.00 Torr  $N_2$ ; (B) Guard bias with the following settings: amplitude of 30 V, RF amplitude of  $220 V_{pp}$  at 650 kHz, and 2.75 mm gap at 4.00 Torr  $N_2$ ; (C) RF amplitude at 650 kHz using traveling wave amplitude of 30 V, guard bias was set to be 5 V, and 2.75 mm gap at 4.00 Torr  $N_2$ .

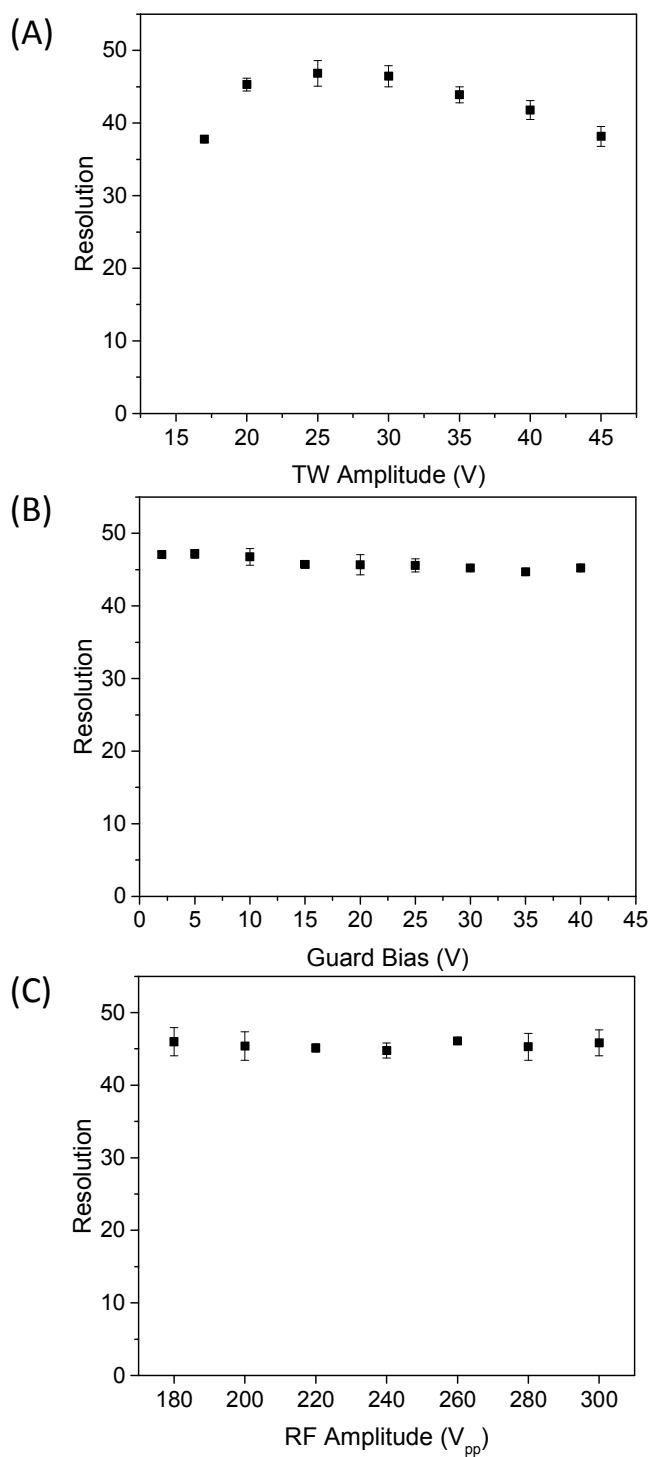

**Figure S-5.** Ion mobility spectrum of the 9 peptide and Ultramark mixture sample was obtained by DT-IMS at following conditions: 19 V/cm, 90 cm and 4.00 Torr. The peak capacity was calculated using the same peaks showing in Table S-1.

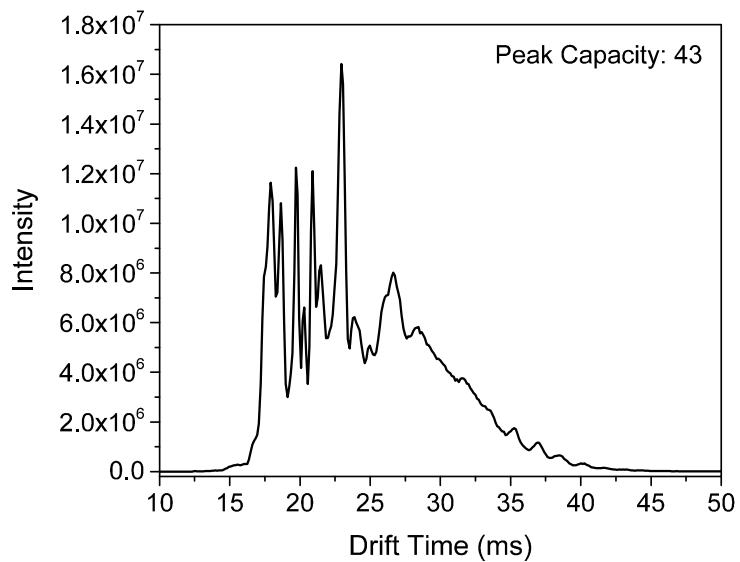

**Table S-1.** The m/z, drift time and FWHM of all peaks observed in Figure 4 and calculated peak capacity and peak generation rate by eq 2 and 3 (blue colored data points were used for calculating the peak capacity and peak generation rate).

| m/z     | Drift Time(ms) | FWHM(ms) | Peak Capacity | Peak Generation Rate (s <sup>-1</sup> ) |
|---------|----------------|----------|---------------|-----------------------------------------|
| 530.72  | 154.93         | 1.62     |               |                                         |
| 541.59  | 130.88         | 1.45     |               |                                         |
| 558.24  | 161.63         | 5.81     |               |                                         |
| 578.77  | 188.40         | 1.63     |               |                                         |
| 614.79  | 203.35         | 1.69     |               |                                         |
| 671.32  | 234.50         | 1.59     |               |                                         |
| 674.28  | 239.71         | 2.10     |               |                                         |
| 685.27  | 235.87         | 1.91     |               |                                         |
| 712.35  | 214.13         | 1.60     |               |                                         |
| 724.80  | 248.58         | 2.84     |               |                                         |
| 727.85  | 273.75         | 1.99     |               |                                         |
| 763.37  | 299.90         | 2.26     |               |                                         |
| 768.74  | 255.68         | 2.48     |               |                                         |
| 811.89  | 337.53         | 2.79     |               |                                         |
| 836.84  | 299.09         | 2.71     |               |                                         |
|         | 304.51         | 2.53     |               |                                         |
| 876.17  | 493.66         | 5.88     | 245.5         | 368.8                                   |
|         | 523.73         | 5.02     |               |                                         |
| 892.76  | 351.90         | 2.22     |               |                                         |
| 897.42  | 389.81         | 2.28     |               |                                         |
| 921.87  | 396.43         | 2.02     |               |                                         |
| 949.45  | 394.27         | 2.77     |               |                                         |
| 956.78  | 400.34         | 2.34     |               |                                         |
| 1021.85 | 448.99         | 2.78     |               |                                         |
| 1121.83 | 504.71         | 3.67     |               |                                         |
|         | 509.53         | 3.32     |               |                                         |
| 1221.80 | 561.25         | 4.74     |               |                                         |
|         | 566.43         | 4.64     |               |                                         |
| 1321.78 | 621.04         | 4.82     |               |                                         |
|         | 629.13         | 4.04     |               |                                         |
| 1421.75 | 678.61         | 4.19     |               |                                         |
|         | 684.42         | 5.27     |               |                                         |
| 1521.72 | 739.32         | 7.51     |               |                                         |
| 1621.71 | 796.59         | 8.14     |               |                                         |
